# Supplementary material
Source: publisher figshare collection journal article supplement (https://acs.figshare.com/ndownloader/files/4542955)
Supplement: Supplementary file 1 [file 4542955]

Supporting information  
Direct modulation of localized surface plasmon coupling of gold nanoparticles on solid  
substrates via weak polyelectrolyte mediated layer-by-layer self assembly

Contents: 1. UV-visible spectra of the nanocomposite films with different bilayer  
number assembled at different pH and the evolution of the intensity ratio of **transverse  
band** peak adsorption to **longitudinal band** peak adsorption with bilayer number at  
different assembly pH (Figure S1, Figure S2, Figure S3, Figure S4).

2. UV-visible spectra fitting of pH 3.4 film using Gaussian distribution  
function (Figure S5).

3. **UV-visible spectra of the nanocomposite films (after baseline correction)**  
**assembled at different pH after immersed in different environment for one month** (pH  
10.0 alkaline solution, pH 3.5 alkaline solution, and 10mM PBS) (Figure S6-Figure S14).

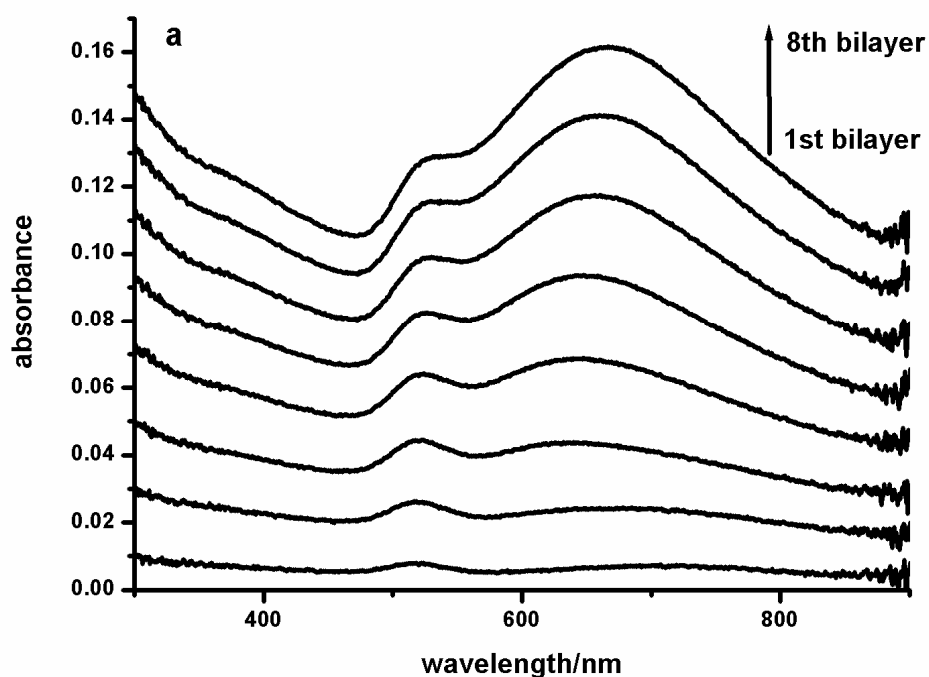

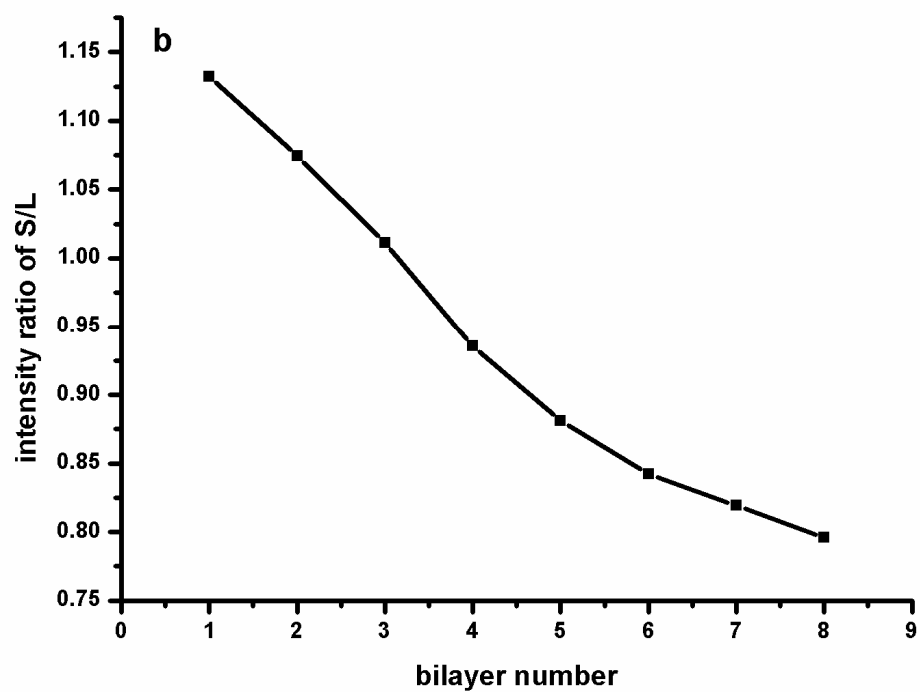

Figure S1. UV-visible spectra of the nanocomposite assembled at pH 5.6 (a) and the intensity ratio of **transverse band** peak adsorption to **longitudinal band** peak adsorption versus the bilayer number of the nanocomposite films assembled at pH 5.6 (b).

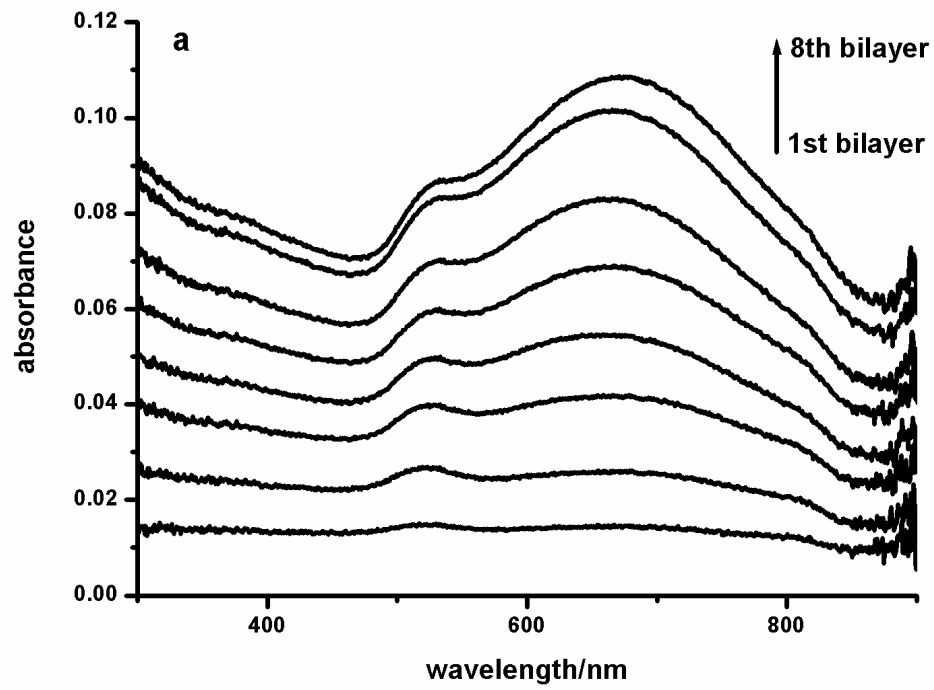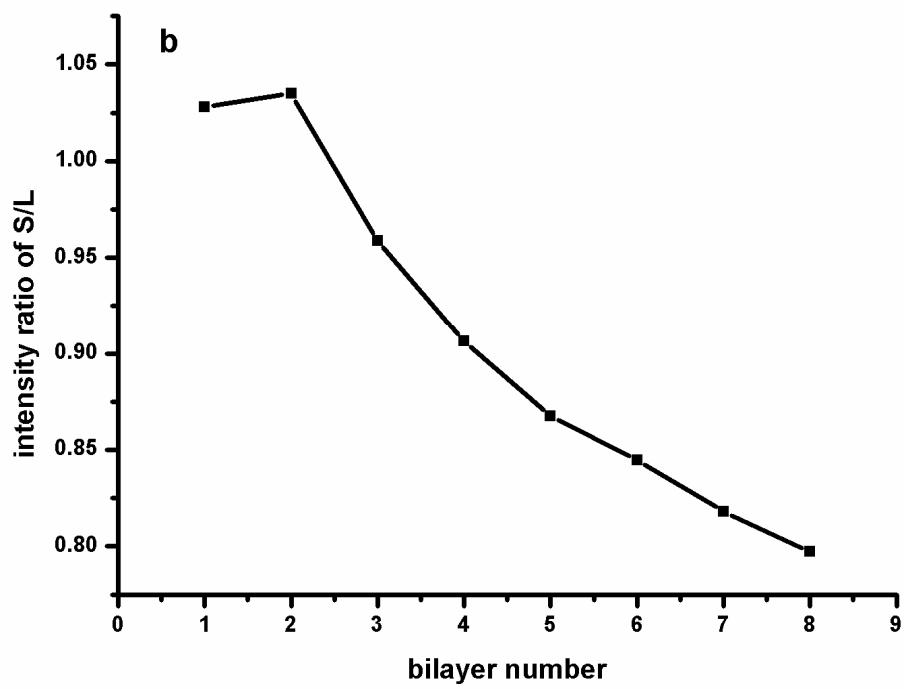

Figure S2. UV-visible spectra of the nanocomposite assembled at pH 6.8 (a) and the intensity ratio of **transverse band** peak adsorption to **longitudinal band** peak adsorption versus the bilayer number of the nanocomposite films assembled at pH 6.8 (b).

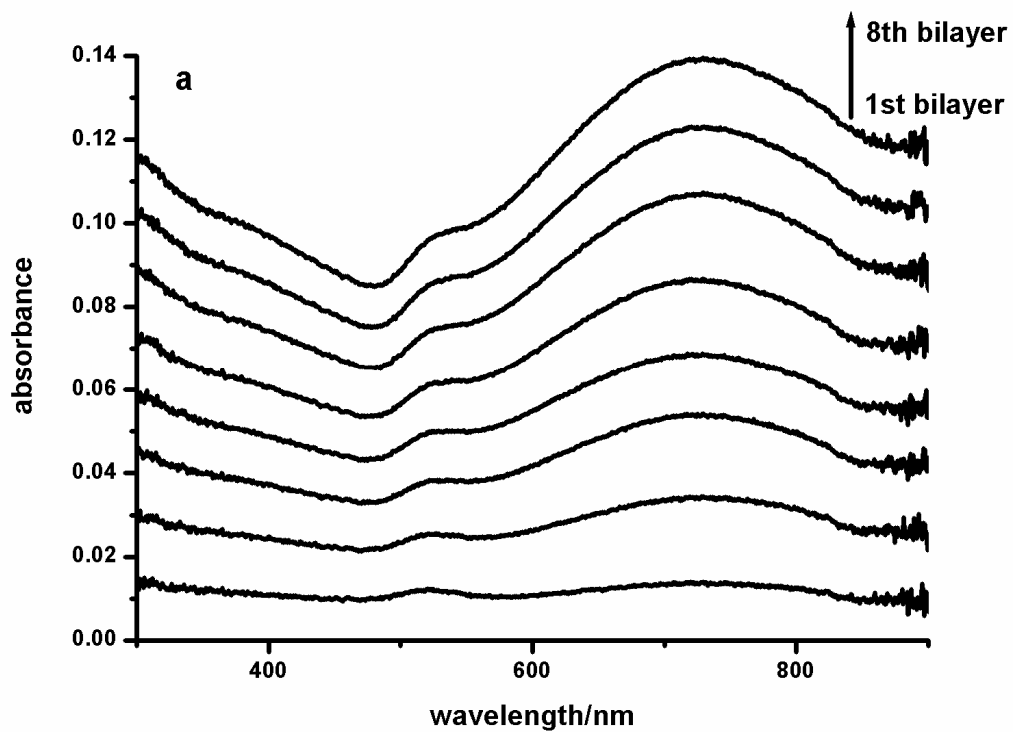

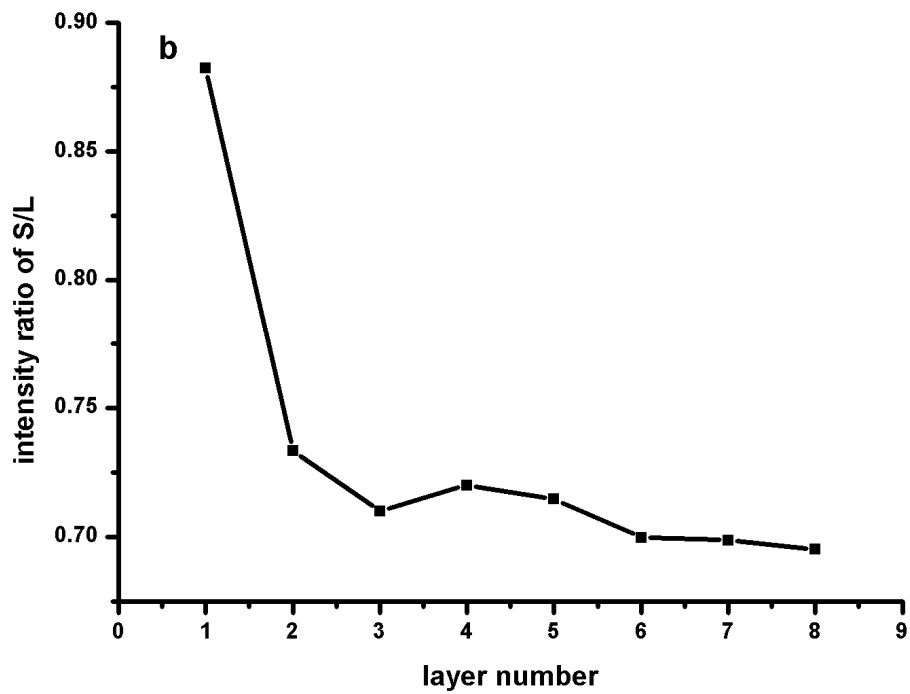

Figure S3. UV-visible spectra of the nanocomposite assembled at pH 7.2 (a) and the intensity ratio of [transverse band](#) peak adsorption to [longitudinal band](#) peak adsorption versus the bilayer number of the nanocomposite films assembled at pH 7.2 (b).

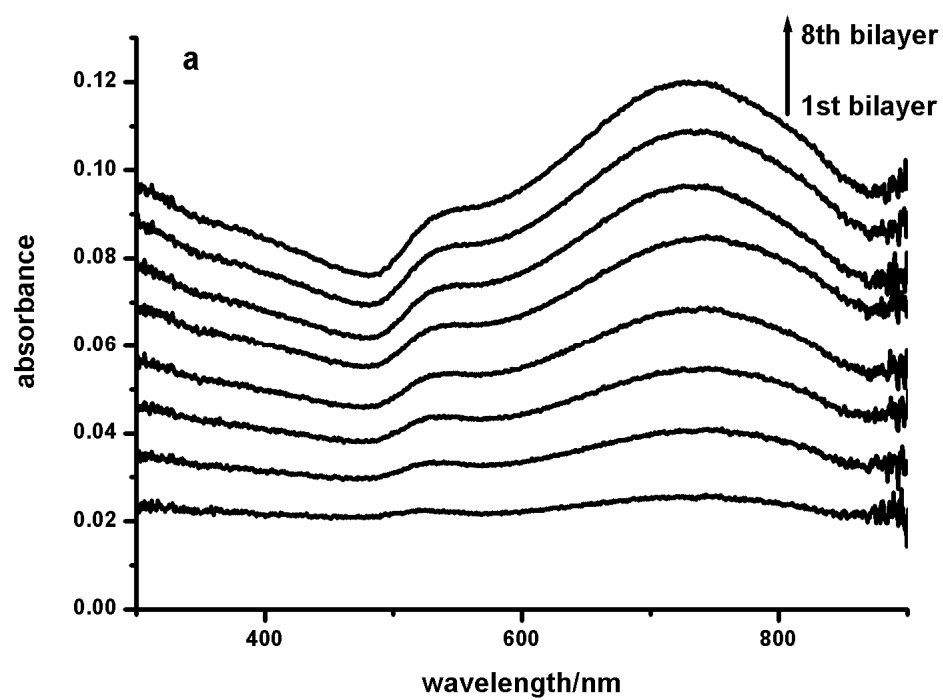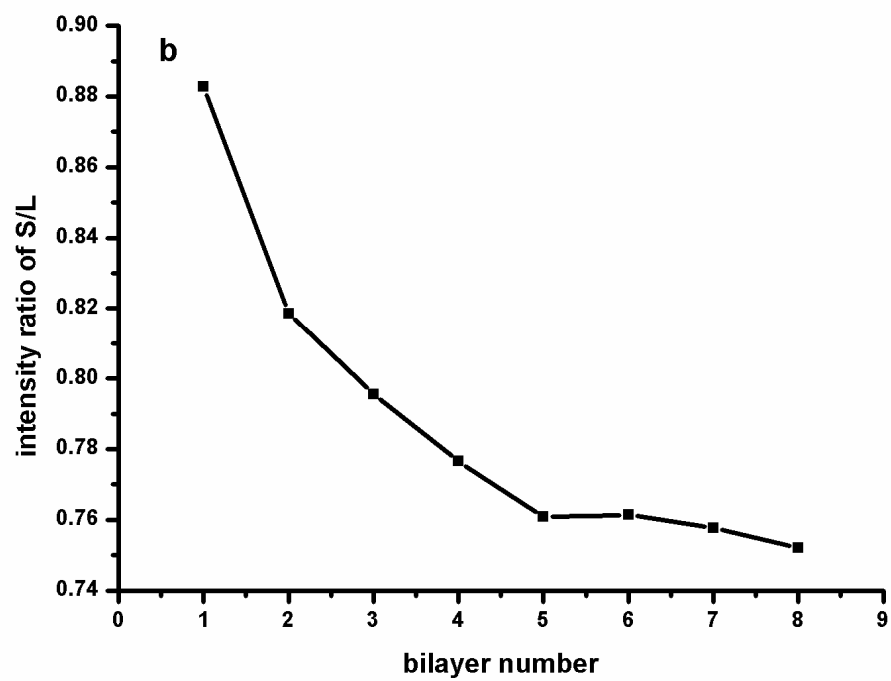

Figure S4. UV-visible spectra of the nanocomposite assembled at pH 10.0 (a) and the intensity ratio of **transverse band** peak adsorption to **longitudinal band** peak adsorption versus the bilayer number of the nanocomposite films assembled at pH 10.0 (b).

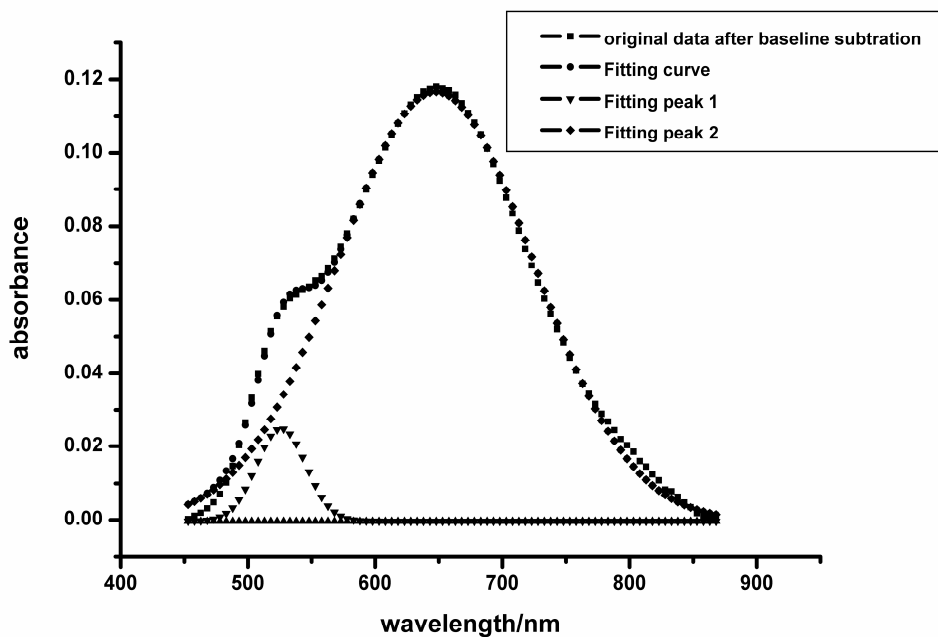

Figure S5. UV-visible spectra fitting of pH 3.4 film using Gaussian distribution function.

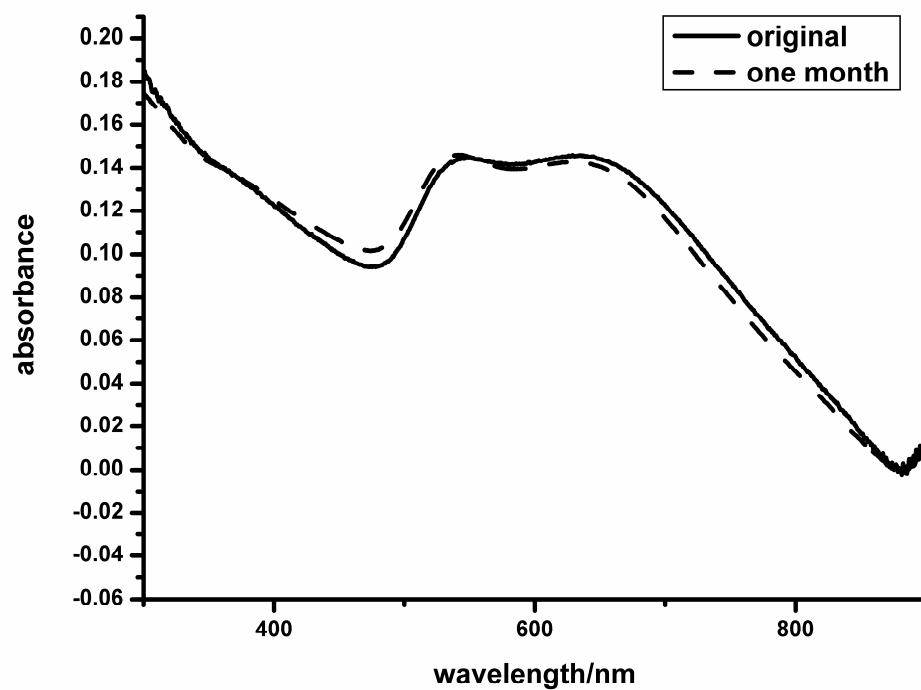

Figure S6. UV-visible spectra of the nanocomposite films assembled at pH 3.4 before and after one month immersion in pH 10 alkaline solution.

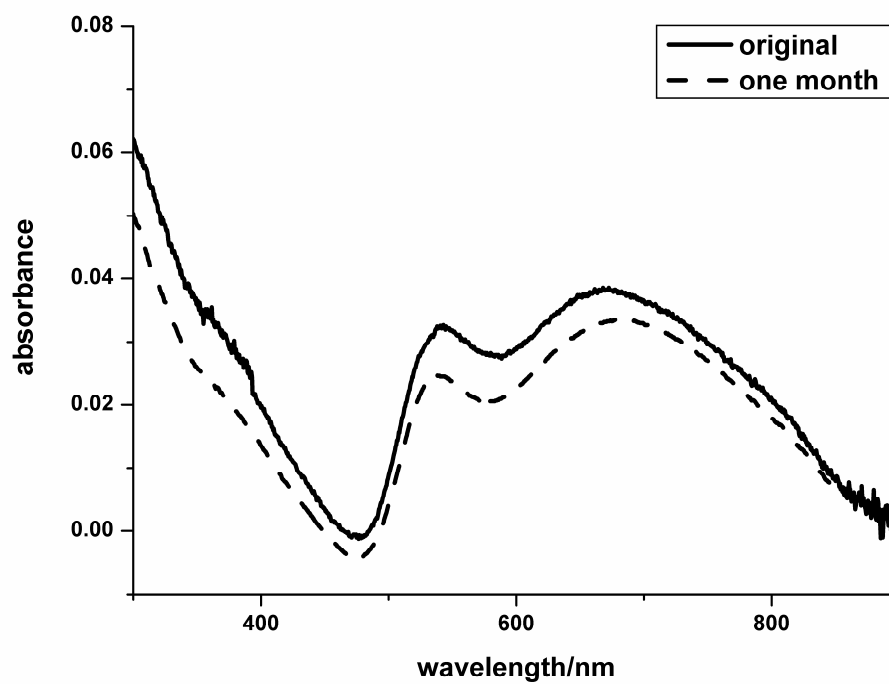



Figure S7. UV-visible spectra of the nanocomposite films assembled at pH 5.6 before and after one month immersion in pH 10 alkaline solution.

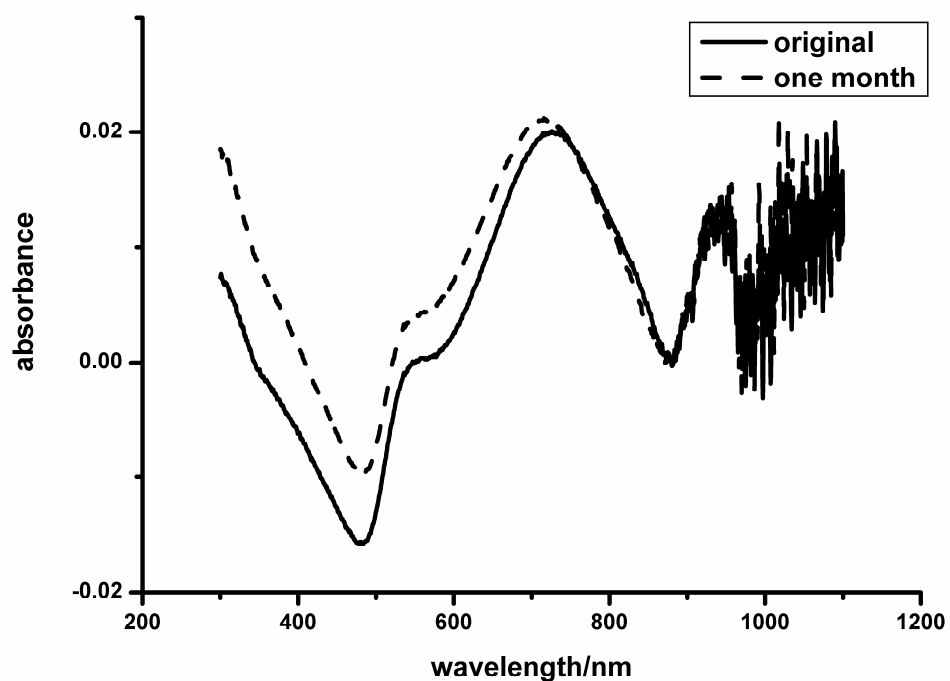

Figure S8. UV-visible spectra of the nanocomposite films assembled at pH 10.0 before and after one month immersion in pH 10 alkaline solution.

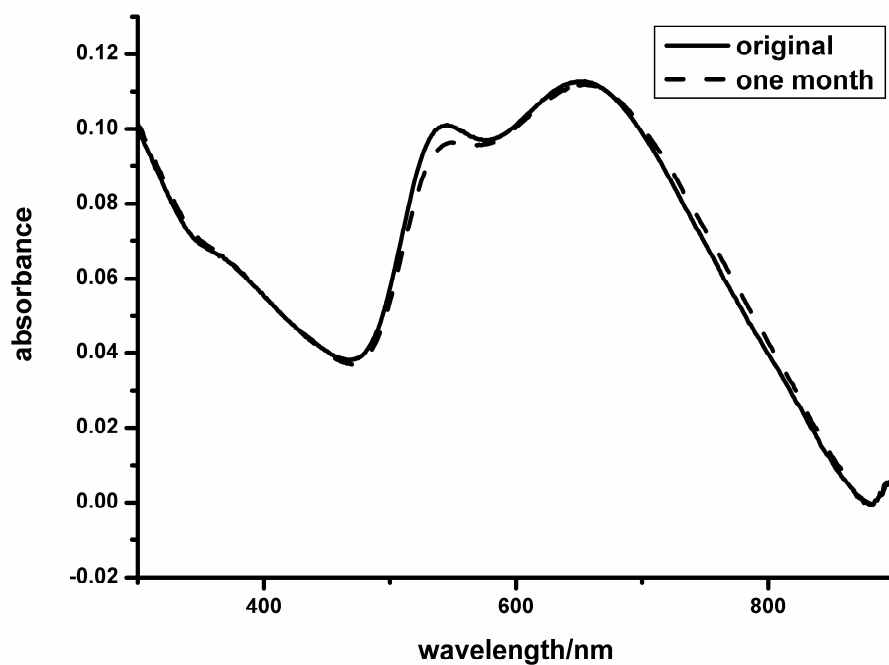

Figure S9. UV-visible spectra of the nanocomposite films assembled at pH 3.4 before and after one month immersion in pH 3.5 acidic solution.

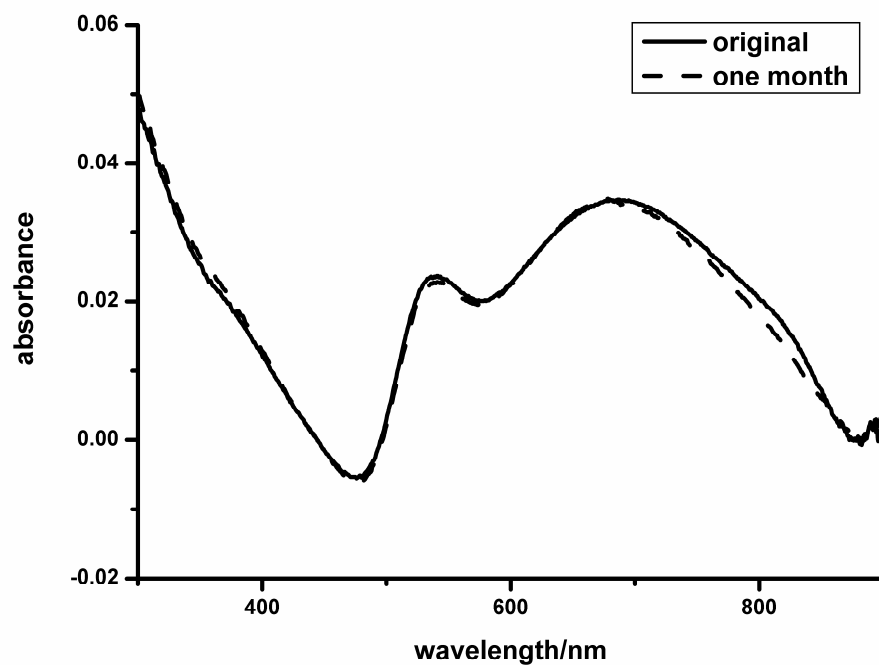

Figure S10. UV-visible spectra of the nanocomposite films assembled at pH 5.6 before and after one month immersion in pH 3.5 acidic solution.

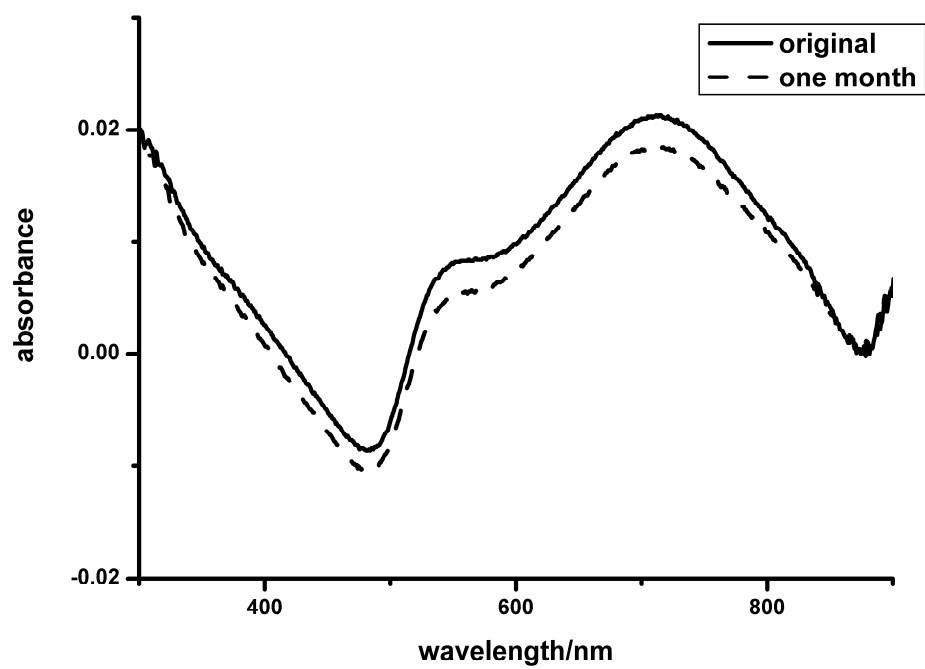

Figure S11. UV-visible spectra of the nanocomposite films assembled at pH 10.0 before and after one month immersion in pH 3.5 acidic solution.

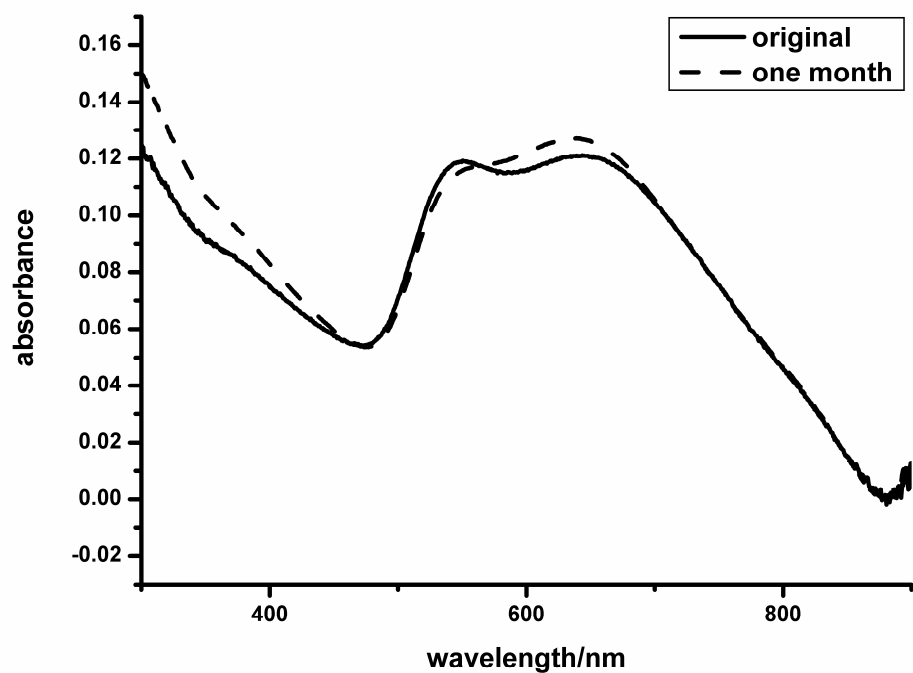

Figure S12. UV-visible spectra of the nanocomposite films assembled at pH 3.4 before and after one month immersion in 10mM PBS.

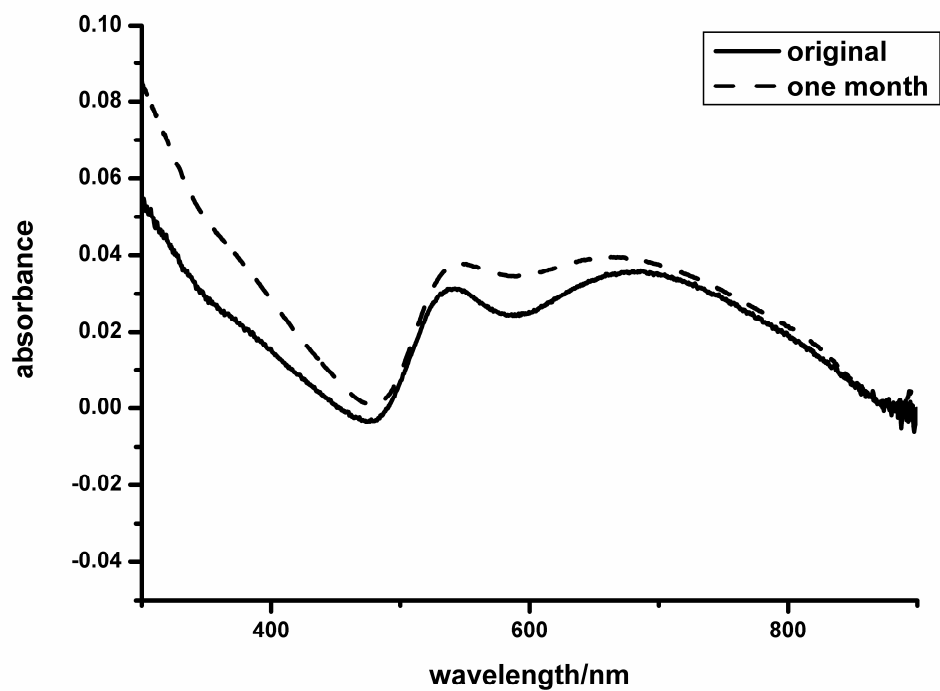

Figure S13. UV-visible spectra of the nanocomposite films assembled at pH 5.6 before and after one month immersion in 10mM PBS.

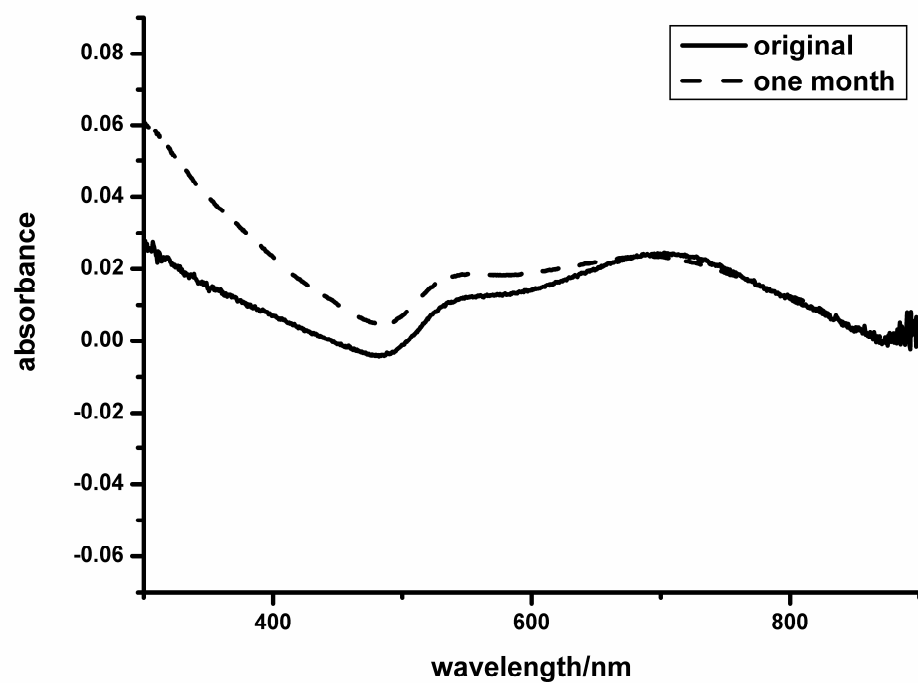

Figure S14. UV-visible spectra of the nanocomposite films assembled at pH 10.0 before and after one month immersion in 10mM PBS.
